# Supplementary material for: Genome-Wide Association Analyses Track Genomic Regions for Resistance to Ascochyta rabiei in Australian Chickpea Breeding Germplasm
Source: Front Plant Sci. 2022 May 18;13:877266. doi: 10.3389/fpls.2022.877266 (PMC9159299; doi:10.3389/fpls.2022.877266)
Supplement: Supplementary file 10 [file Table_7.xlsx]

## Sheet: Sheet1
Supplementary Table 7. List of candidate genes within 20 kb up- and down-stream of the associated SNP. HB: Haplotype block; Chromosome and SNP positions are based on the CDC Frontier reference genome assembly Version 2.6.3 (http:///www.cicer.info/database.php)
Analysis	Germplasm	HB	Isolate	CHR	DArTseq Marker	SNP position	20 kb down	20 Kb up	GeneID	START (bp)	END (bp)	SNP within the gene	Annotation
HTR	GWAS SET	2	TR9571	Ca1	10263753|F|0-16:A>G, 15990253|F|0-37:G>A, 10264166|F|0-49:T>C, 15990210|F|0-55:T>A, 10263851|F|0-65:C>T, 15990270|F|0-53:A>G	753982-908551	733982	928551	Ca06910	732873	734207		Vinorine synthase-like
									Ca06919	735710	738460		Bidirectional sugar transporter3-like
									Ca06916	748313	754851	Yes	protein FAM135B-like
									Ca06918	757387	761417		Tubby-like F-box protein
									Ca06950	766893	767724		Uncharacterized protein n=2 Tax=Phaseolus angularis RepID=A0A0L9VG55_PHAAN
									Ca06949	769558	800679		Uncharacterized protein LOC101300394 n=1 Tax=Fragaria vesca subsp. vesca RepID=UPI0005C986B1
									Ca06946	810212	813608		Fructose-1,6-bisphosphatase
									Ca06945	815597	818556		Actin-97
									Ca06938	822292	824960		Cytochrome b-c1 complex subunit 6
									Ca06937	831386	832039		Uncharacterized protein n=3 Tax=Papilionoideae RepID=A0A072TSY7_MEDTR
									Ca06939	837760	839358		Cytochrome b-c1 complex subunit 6-like
									Ca06943	841087	845105		Serine decarboxylase
									Ca06934	850571	853095		Peroxidase
									Ca06933	854396	856422		Putative clathrin assembly protein At1g03050
									Ca06948	857113	858197		Uncharacterized protein n=3 Tax=Soja RepID=K7M9P7_SOYBN
									Ca06947	860082	869618		Phosphatidylserine decarboxylase proenzyme 2
									Ca06944	870558	871435		NAC transcription factor ONAC010-like
									Ca06935	876540	878555		Glycosyltransferase
									Ca06941	879114	880529		UDP-glycosyltransferase
									Ca06936	882184	883620		UDP-glycosyltransferase
									Ca06942	884126	889530	Yes	Beta-xylosidase/alpha-L-arabinofuranosidase 1
									Ca06923	900561	905625	Yes	Somatic embryogenesis receptor kinase
									Ca06929	907088	913677	Yes	Uncharacterized protein n=13 Tax=Papilionoideae RepID=A0A0S3S1X9_PHAAN
									Ca06922	920036	926273	Yes	Aminotransferase ALD1-like
									Ca06926	927315	928796		F-box/kelch-repeat protein At1g22040-like
HTR	GWAS SET	4	TR9571	Ca1	10268610|F|0-44:A>G, 10264851|F|0-12:G>C, 10266086|F|0-36:T>A, 23870821|F|0-31:A>T, 29631667|F|0-9:G>A, 10263639|F|0-27:C>G	924691-973310	904691	993310	Ca06923	900561	905625		Somatic embryogenesis receptor kinase 2
									Ca06929	907088	913677		Uncharacterized protein n=13 Tax=Papilionoideae RepID=A0A0S3S1X9_PHAAN
									Ca06922	920036	926273		Aminotransferase ALD1-like
									Ca06926	927315	928796		F-box/kelch-repeat protein At1g22040-like
									Ca06924	939333	950691	Yes	High affinity sulfate transporter 2-like
									Ca06925	951661	952212		Chaperone protein dnaJ 20, chloroplastic-like
									Ca06928	957334	958734		Non-specific lipid-transfer protein-like protein At5g64080
									Ca06927	962238	968062	Yes	Probable protein phosphatase 2C 62
									Ca06920	969516	970851	Yes	Light-harvesting complex I chlorophyll A/B-binding protein
									Ca06931	970961	973786	Yes	Uncharacterized protein LOC101509972 n=1 Tax=Cicer arietinum RepID=UPI00032ACEAC
									Ca06930	974458	975815		Cationic peroxidase 2-like
									Ca06921	978396	980205		probable inactive receptor kinase At2g26730
									Ca06932	980577	986528		uncharacterized protein LOC101510618 isoform X1 n=1 Tax=Cicer arietinum RepID=UPI00032AA6B3
									Ca06973	988914	993551	Yes	putative pumilio homolog 7, chloroplastic
HTR	GWAS SET	5	F-17191-1/TR9571	Ca1	10268412|F|0-6:G>A, 15990186|F|0-51:G>C, 23870754|F|0-8:G>T, 5825528|F|0-21:A>C, 10267161|F|0-22:C>T, 10268547|F|0-33:G>A, 10265668|F|0-61:C>G	992178-1108145	972178	1128145	Ca06931	970961	973786		uncharacterized protein LOC101509972 n=1 Tax=Cicer arietinum RepID=UPI00032ACEAC
									Ca06930	974458	975815		cationic peroxidase 2-like
									Ca06921	978396	980205		probable inactive receptor kinase At2g26730
									Ca06932	980577	986528		uncharacterized protein LOC101510618 isoform X1 n=1 Tax=Cicer arietinum RepID=UPI00032AA6B3
									Ca06973	988914	993551	Yes	putative pumilio homolog 7, chloroplastic
									Ca06970	996242	1001292		CD2 antigen cytoplasmic tail-binding protein 2
									Ca06971	1002529	1008430	Yes	Potassium transporter
									Ca06967	1022794	1034531		calmodulin-binding transcription activator 2-like isoform X1
									Ca06969	1036154	1039254		ribosome biogenesis regulatory protein homolog
									Ca06968	1040607	1043018		monoacylglycerol lipase ABHD6
									Ca06966	1045859	1049210		uncharacterized protein LOC101515692 n=1 Tax=Cicer arietinum RepID=UPI00032A7AA5
									Ca06976	1049441	1059753	Yes	metacaspase-3-like isoform X1
									Ca06975	1060839	1065232		uncharacterized protein LOC101489448 n=1 Tax=Cicer arietinum RepID=UPI00032AAA12
									Ca06965	1076595	1077488		protein EXORDIUM-like 2
									Ca06974	1078755	1084004		phospho-2-dehydro-3-deoxyheptonate aldolase 2, chloroplastic-like
									Ca06955	1086106	1089873		Uncharacterized protein n=11 Tax=rosids RepID=M5W849_PRUPE
									Ca06957	1093007	1096647	Yes	DNA (Cytosine-5)-methyltransferase
									Ca06958	1098717	1108566	Yes	probable DNA helicase MCM9
									Ca06962	1110972	1114236		2-oxoglutarate/malate translocator
									Ca06956	1117752	1119975		bifunctional riboflavin biosynthesis protein RIBA 1, chloroplastic
									Ca06952	1122537	1122863		classical arabinogalactan protein 1-like
LR	CBA Captain/CICA1841	NA	TR9571	Ca1	8776079|F|0-18:T>A	1057756	1037756	1077756	Ca06967	1022794	1034531		calmodulin-binding transcription activator 2-like isoform X1
									Ca06969	1036154	1039254		ribosome biogenesis regulatory protein homolog
									Ca06968	1040607	1043018		monoacylglycerol lipase ABHD6
									Ca06966	1045859	1049210		uncharacterized protein LOC101515692
									Ca06976	1049441	1059753	Yes	metacaspase-3-like isoform X1
									Ca06975	1060839	1065232		uncharacterized protein LOC101489448
									Ca06965	1076595	1077488		protein EXORDIUM-like 2
LR	CBA Captain/CICA1841	NA	TR9571	Ca1	5825513|F|0-30:A>G	1099878	1079878	1119878	Ca06974	1078755	1084004		phospho-2-dehydro-3-deoxyheptonate aldolase 2, chloroplastic-like
									Ca06955	1086106	1089873		Uncharacterized protein
									Ca06957	1093007	1096647		DNA (Cytosine-5)-methyltransferase
									Ca06958	1098717	1108566	Yes	probable DNA helicase MCM9
									Ca06962	1110972	1114236		2-oxoglutarate/malate translocator
									Ca06956	1117752	1119975		bifunctional riboflavin biosynthesis protein RIBA 1, chloroplastic
LR	CBA Captain/CICA1841	NA	TR9571	Ca1	10264027|F|0-26:C>G	1276750	1256750	1296750	Ca07370	1250415	1256769		uncharacterized protein LOC101496564
									Ca07339	1258983	1265925		KH domain-containing protein At4g18375-like
									Ca07337	1269272	1278644	Yes	Dynamin 3A-like protein
									Ca07379	1285198	1286484		40S ribosomal protein S5-like
									Ca07372	1292641	1298134		putative glutamine amidotransferase-like protein C13C5.04
LR	CBA Captain/CICA1841	NA	TR9571	Ca1	10268713|F|0-14:C>T	1403836	1383836	1423836	Ca07358	1387112	1390243		Magnesium transporter CorA family protein
									Ca07340	1392021	1395645		Heat shock 70 kDa protein, mitochondrial
									Ca07336	1397623	1404381	Yes	DNA polymerase V
									Ca07363	1404696	1407361		transcription factor GTE7-like
LR	CBA Captain/CICA1841	NA	TR9571	Ca1	5825611|F|0-68:G>A	1709484	1689484	1729484	Ca06990	1686075	1692104		NAD(P)H dehydrogenase (quinone) FQR1-like
									Ca06991	1695698	1719782	Yes	G-type lectin S-receptor-like serine/threonine-protein kinase B120
									Ca06983*	1703510	1707413		receptor-like serine/threonine-protein kinase SD1-8	nov_miR66
									Ca06987	1724303	1724911		uncharacterized protein At1g08160-like
									Ca06988	1727088	1729550		uncharacterized protein LOC101491789
LR	CBA Captain/CICA1841 and PBADrummond/CICA1841	NA	TR9571	Ca1	5825150|F|0-67:A>G	1709549	1689549	1729549	Ca06990	1686075	1692104		NAD(P)H dehydrogenase (quinone) FQR1-like
									Ca06991	1695698	1719782	Yes	G-type lectin S-receptor-like serine/threonine-protein kinase
									Ca06983	1703510	1707413		receptor-like serine/threonine-protein kinase SD1-8
									Ca06987	1724303	1724911		uncharacterized protein At1g08160-like
									Ca06988	1727088	1729550		uncharacterized protein LOC101491789
MLMM	GWAS SET	NA	TR9571	Ca1	10270127|F|0-58:A>T	1781336	1761336	1801336	Ca06978	1779699	1780313		Putative ribonuclease H protein
									Ca06981	1759903	1763257		ation/H(+) antiporter 15-like
									Ca06994	1785328	1789751		lysine-specific demethylase
									Ca06997	1789857	1790499		lysine-specific demethylase
									Ca07001	1792305	1796544
LR	CBA Captain/CICA1841	NA	TR9571	Ca1	10270127|F|0-58:A>T	1781336	1761336	1801336	Ca06978	1779699	1780313		Putative ribonuclease H protein
									Ca06981	1759903	1763257		cation/H(+) antiporter 15-like
									Ca06994	1785328	1789751		lysine-specific demethylase JMJ25-like
									Ca06997	1789857	1790499		lysine-specific demethylase JMJ25-like
									Ca07001	1792305	1796544		uncharacterized aarF domain-containing protein kinase 2
LR	CBA Captain/CICA1841	NA	TR9571	Ca1	5825351|F|0-49:C>A	1781393	1761393	1801393	Ca06981	1759903	1763257		cation/H(+) antiporter 15-like
									Ca06985	1764614	1775971		Uncharacterized protein
									Ca06978	1779699	1780313		Putative ribonuclease H protein
									Ca06994	1785328	1789751		lysine-specific demethylase JMJ25-like
									Ca06997	1789857	1790499		lysine-specific demethylase JMJ25-like
									Ca07001	1792305	1796544		uncharacterized aarF domain-containing protein kinase 2
MLMM	GWAS SET	NA	F17191-1	Ca1	8776174|F|0-13:T>C	1820681	1800681	1840681	Ca07008	1802248	1802536		Uncharacterized protein n=2 Tax=Mesangiospermae RepID=A0A059DJU2_EUCGR
									Ca06998	1809681	1811241		transcription factor MYB39
									Ca07004	1817615	1822820	Yes	putative PAP-specific phosphatase
									Ca06995	1824315	1825670		uncharacterized protein LOC101497320 n=1 Tax=Cicer arietinum RepID=UPI00032A6175
									Ca07005	1826474	1832173		external alternativeAD(P)H-ubiquinone oxidoreductase
									Ca07000	1840094	1840909		uncharacterized protein LOC101496994 isoform X1 n=3 Tax=Cicer arietinum RepID=UPI000640E2AC
LR	CBA Captain/CICA1841	NA	TR9571	Ca1	8776174|F|0-13:T>C	1820681	1800681	1840681	Ca07008	1802248	1802536		Uncharacterized protein n=2 Tax=Mesangiospermae RepID=A0A059DJU2_EUCGR
									Ca06998	1809681	1811241		transcription factor MYB39
									Ca07004	1817615	1822820	Yes	putative PAP-specific phosphatase
									Ca06995	1824315	1825670		uncharacterized protein LOC101497320 n=1 Tax=Cicer arietinum RepID=UPI00032A6175
									Ca07005	1826474	1832173		external alternativeAD(P)H-ubiquinone oxidoreductase
									Ca07000	1840094	1840909		uncharacterized protein LOC101496994 isoform X1 n=3 Tax=Cicer arietinum RepID=UPI000640E2AC
LR	CBA Captain/CICA1841	NA	TR9571	Ca1	5826146|F|0-16:A>G	1886221	1866221	1906221	Ca07002	1882110	1887726	Yes	Calmodulin-binding protein
									Ca07015	1892033	1902731		sphingosine kinase 1 isoform
									Ca07023	1904765	1907972		protein YLS3
									Ca07020	1909159	1910637		uncharacterized protein LOC101499608
									Ca07010	1925757	1926671		Uncharacterized protein
									Ca07018	1938649	1939565		uncharacterized protein LOC101501207
									Ca07017	1963170	1963610		Uncharacterized protein
HTR	GWAS SET	8	F-17191-1/TR9571	Ca1	5826146|F|0-16:A>G, 5825490|F|0-61:A>T, 8776077|F|0-27:G>A, 5825728|F|0-33:C>T, 5825483|F|0-12:A>G	1886221-1976301	1866221	1996301	Ca06999	1868406	1871922		putative FBD-associated F-box protein
									Ca07002	1882110	1887726	Yes	Calmodulin-binding protein
									Ca07015	1892033	1902731		sphingosine kinase 1 isoform
									Ca07023	1904765	1907972		protein YLS3
									Ca07011	1932733	1937683		Pre-mRNA-splicing factor
									Ca07019	1948254	1950745		Organic solute transporter ostalpha protein
									Ca07022	1953239	1955385	Yes	NADPH-dependent quinone oxidoreductase
									Ca07021	1956071	1959279	Yes	NADPH-dependent quinone oxidoreductase
									Ca07016	1964632	1966937		endonuclease 1
									Ca07012	1970539	1974803		Transmembrane amino acid transporter family protein
									Ca07013	1976843	1980978		PAP-specific phosphatase HAL2-like
LR	CBA Captain/CICA1841	NA	TR9571	Ca1	5825490|F|0-61:A>T	1954280	1934280	1974280	Ca07011	1932733	1937683		Pre-mRNA-splicing factor SYF1-like protein
									Ca07018	1938649	1939565		uncharacterized protein LOC101501207
									Ca07019	1948254	1950745		Organic solute transporter ostalpha protein
									Ca07022	1953239	1955385	Yes	NADPH-dependent quinone oxidoreductase
									Ca07021	1956071	1959279		NADPH-dependent quinone oxidoreductase
									Ca07017	1963170	1963610		Uncharacterized protein
									Ca07016	1964632	1966937		endonuclease 1
									Ca07012	1970539	1974803		Transmembrane amino acid transporter family protein
LR	CBA Captain/CICA1841	NA	TR9571	Ca1	8776077|F|0-27:G>A	1954312	1934312	1974312	Ca07011	1932733	1937683		Pre-mRNA-splicing factor SYF1-like protein
									Ca07018	1938649	1939565		uncharacterized protein LOC101501207
									Ca07019	1948254	1950745		Organic solute transporter ostalpha protein
									Ca07022	1953239	1955385	Yes	NADPH-dependent quinone oxidoreductase
									Ca07021	1956071	1959279		NADPH-dependent quinone oxidoreductase
									Ca07017	1963170	1963610		Uncharacterized protein
									Ca07016	1964632	1966937		endonuclease 1
									Ca07012	1970539	1974803		Transmembrane amino acid transporter family protein
LR	CBA Captain/CICA1841	NA	TR9571	Ca1	5825728|F|0-33:C>T	1956331	1936331	1976331	Ca07018	1938649	1939565		uncharacterized protein LOC101501207
									Ca07021	1956071	1959279	Yes	NADPH-dependent quinone oxidoreductase
									Ca07017	1963170	1963610		Uncharacterized protein
									Ca07017	1963170	1963610		Uncharacterized protein
									Ca07016	1964632	1966937		endonuclease 1
									Ca07012	1970539	1974803		Transmembrane amino acid transporter family protein
									Ca07013	1976843	1980978		PAP-specific phosphatase HAL2-like
									Ca07009	1981971	1982396		putative glycine-rich cell wall structural protein 1
									Ca07028	1984880	1989292		Secretory carrier-associated membrane protein
LR	CBA Captain/CICA1841	NA	TR9571	Ca1	5825483|F|0-12:A>G	1976301	1956301	1996301	Ca07021	1956071	1959279		NADPH-dependent quinone oxidoreductase
									Ca07017	1963170	1963610		Uncharacterized protein
									Ca07016	1964632	1966937		endonuclease 1
									Ca07012	1970539	1974803		Transmembrane amino acid transporter family protein
									Ca07013	1976843	1980978		PAP-specific phosphatase
									Ca07009	1981971	1982396		putative glycine-rich cell wall structural protein 1
									Ca07028	1984880	1989292		Secretory carrier-associated membrane protein
LR	CBA Captain/CICA1841	NA	TR9571	Ca1	5826122|F|0-42:A>C	2002343	1982343	2022343	Ca07009	1981971	1982396		putative glycine-rich cell wall structural protein 1
									Ca07028	1984880	1989292		Secretory carrier-associated membrane protein
									Ca07030*	2001002	2002378	Yes	Secretory carrier-associated membrane protein
									Ca07031	2002416	2003433		Secretory carrier-associated membrane protein (Fragment)
									Ca07029	2014847	2016107		uncharacterized protein LOC101510509
									Ca07027	2022483	2039894		Lysine ketoglutarate reductase trans-splicing-like protein
LR	CBA Captain/CICA1841	NA	TR9571	Ca1	5826122|F|0-42:A>C	2023826	2003826	2043826	Ca07029	2014847	2016107		uncharacterized protein LOC101510509
									Ca07027	2022483	2039894	Yes	Lysine ketoglutarate reductase trans-splicing-like protein
LR	CBA Captain/CICA1841	NA	TR9571	Ca1	10266146|F|0-29:G>C	2123949	2103949	2143949	Ca07040	2103260	2106695		uncharacterized protein LOC101509108
									Ca07039	2112087	2113196		F-box/kelch-repeat protein At1g16250-like
									Ca07033	2123840	2124130	Yes	Uncharacterized protein
									Ca07042	2124671	2129065		Uncharacterized protein
									Ca07034	2132821	2144257		DNA repair protein RAD5
LR	CBA Captain/CICA1841 and PBADrummond/CICA1841	NA	TR9571	Ca1	10268252|F|0-58:C>A	2126529	2106529	2146529	Ca07040	2103260	2106695		uncharacterized protein LOC101509108
									Ca07039	2112087	2113196		F-box/kelch-repeat protein At1g16250-like
									Ca07033	2123840	2124130		Uncharacterized protein n=1 Tax=Medicago truncatula
									Ca07042	2124671	2129065		Uncharacterized protein n=73 Tax=Mesangiospermae
									Ca07034	2132821	2144257		DNA repair protein RAD5
									Ca07037	2145515	2146884		serine/threonine-protein phosphatase 7 long form homolog
LR	CBA Captain/CICA1841	NA	TR9571	Ca1	10267614|F|0-39:T>G	2163464	2143464	2183464	Ca07034	2132821	2144257		DNA repair protein RAD5
									Ca07037	2145515	2146884		serine/threonine-protein phosphatase 7 long form homolog
									Ca07041	2151302	2151892		toll/interleukin-1 receptor-like protein
									Ca07035	2162798	2167541	Yes	CIP7 , related
									Ca07036	2168791	2172501		uncharacterized protein At4g04980-like isoform X5 n=1 Tax=Cicer arietinum
									Ca07038	2172617	2174422		Polyphenol oxidase
LR	CBA Captain/CICA1841 and PBADrummond/CICA1841	NA	TR9571	Ca1	10266294|F|0-42:T>C	2170923	2150923	2190923	Ca07041	2151302	2151892		toll/interleukin-1 receptor-like protein
									Ca07035	2162798	2167541		CIP7 , related
									Ca07036	2168791	2172501	Yes	uncharacterized protein At4g04980-like isoform X5 n=1 Tax=Cicer arietinum
									Ca07038	2172617	2174422		Polyphenol oxidase
									Ca07055	2185737	2193039		allantoinase isoform X1
LR	CBA Captain/CICA1841	NA	TR9571	Ca1	10266451|F|0-21:T>C	2170968	2150968	2190968	Ca07036	2168791	2172501	Yes	uncharacterized protein At4g04980-like isoform X5 n=1 Tax=Cicer arietinum
									Ca07038	2172617	2174422		Polyphenol oxidase
									Ca07055	2185737	2193039		allantoinase isoform X1
LR	CBA Captain/CICA1841	NA	TR9571	Ca1	5825215|F|0-64:T>C	2196062	2176062	2216062	Ca07055	2185737	2193039		Allantoinase isoform X1
									Ca07050	2194209	2196452	Yes	Fatty acid desaturase: Peptidase M,eutral zinc metallopeptidases, zinc-binding site
									Ca07056	2204037	2207716		Uncharacterized protein n=8 Tax=fabids RepID=A0A0S3S2K6_PHAAN
									Ca07049	2215491	2217349		CBS domain-containing protein CBSX5-like
LR	CBA Captain/CICA1841	NA	TR9571	Ca1	5825488|F|0-37:G>A	2206093	2186093	2226093	Ca07055	2185737	2193039		allantoinase isoform X1
									Ca07050	2194209	2196452		Fatty acid desaturase: Peptidase M,eutral zinc metallopeptidases, zinc-binding site
									Ca07056	2204037	2207716	Yes	Uncharacterized protein n=8 Tax=fabids
									Ca07049	2215491	2217349		CBS domain-containing protein CBSX5-like
									Ca07057	2220499	2223571		acetolactate synthase 3, chloroplastic-like isoform X3
									Ca07046	2226054	2234161		U2 snRNP auxilliary factor, large subunit, splicing factor
LR	CBA Captain/CICA1841	NA	TR9571	Ca1	5826258|F|0-16:G>T	2255772	2235772	2275772	Ca07044	2236383	2238698		Stem-specific TSJT1-like protein
									Ca07051	2239614	2252564		mediator of RNA polymerase II transcription subunit
									Ca07053	2254542	2261070	Yes	proteinaceous RNase
									Ca07047	2262604	2265236		putative serine/threonine-protein kinase
									Ca07054	2266096	2269769		Clathrin light chain-like protein
									Ca07045	2273993	2277320		anthocyanidin reductase-like
LR	CBA Captain/CICA1841	NA	TR9571	Ca1	5825217|F|0-18:A>C	2259042	2239042	2279042	Ca07051	2239614	2252564		mediator of RNA polymerase II transcription subunit 16-like isoform X1
									Ca07053	2254542	2261070	Yes	proteinaceous RNase P 2
									Ca07047	2262604	2265236		putative serine/threonine-protein kinase
									Ca07054	2266096	2269769		Clathrin light chain-like protein
									Ca07045	2273993	2277320		anthocyanidin reductase-like
LR	CBA Captain/CICA1841	NA	TR9571	Ca1	5825262|F|0-11:C>T	2297411	2277411	2317411	Ca07043	2280952	2283075		uncharacterized protein At4g19900 n=1 Tax=Cicer arietinum
									Ca07052	2284145	2286272		Polyol/monosaccharide transporter 1
									Ca07063	2287446	2295017		splicing factor 3B subunit 2-like
									Ca07062	2299787	2300629		dof zinc finger protein DOF4.7-like
									Ca07064	2307290	2311198		uncharacterized protein LOC101491377 n=1 Tax=Cicer arietinum
									Ca07060	2312849	2314091		Stress-related protein
									Ca07069	2314490	2316457		pentatricopeptide repeat-containing protein At4g21705, mitochondrial
LR	CBA Captain/CICA1841	NA	TR9571	Ca1	5826138|F|0-33:G>C	2300680	2280680	2320680	Ca07043	2280952	2283075		uncharacterized protein At4g19900 n=1 Tax=Cicer arietinum
									Ca07052	2284145	2286272		Polyol/monosaccharide transporter 1
									Ca07063	2287446	2295017		splicing factor 3B subunit 2-like
									Ca07062	2299787	2300629		zinc finger protein DOF4.7-like
									Ca07064	2307290	2311198		uncharacterized protein LOC101491377 n=1 Tax=Cicer arietinum
									Ca07060	2312849	2314091		stress-related protein
									Ca07069	2314490	2316457		pentatricopeptide repeat-containing protein At4g21705, mitochondrial
									Ca07058	2318778	2319140		uncharacterized protein LOC101492576 n=1 Tax=Cicer arietinum
									Ca07067	2319694	2320410		enoyl-CoA delta isomerase 2, peroxisomal-like
LR	CBA Captain/CICA1841	NA	TR9571	Ca1	10268534|F|0-6:A>G	2304172	2284172	2324172	Ca07052	2284145	2286272		Polyol/monosaccharide transporter 1
									Ca07063	2287446	2295017		splicing factor 3B subunit 2-like
									Ca07062	2299787	2300629		dof zinc finger protein DOF4.7-like
									Ca07064	2307290	2311198		uncharacterized protein LOC101491377 n=1 Tax=Cicer arietinum
									Ca07060	2312849	2314091		stress-related protein
									Ca07069	2314490	2316457		pentatricopeptide repeat-containing protein At4g21705, mitochondrial
									Ca07058	2318778	2319140		uncharacterized protein LOC101492576 n=1 Tax=Cicer arietinum
									Ca07067	2319694	2320410		enoyl-CoA delta isomerase 2, peroxisomal-like
									Ca07072	2323421	2328424		Putative tRNA (cytidine(32)/guanosine(34)-2'-O)-methyltransferase
LR	CBA Captain/CICA1841	NA	TR9571	Ca1	8776064|F|0-37:G>A	2346588	2326588	2366588	Ca07072	2323421	2328424		Putative tRNA (cytidine(32)/guanosine(34)-2'-O)-methyltransferase
									Ca07061	2328679	2330097		pentatricopeptide repeat-containing protein At2g29760, chloroplastic-like
									Ca07073	2331047	2331736		E3 ubiquitin-protein ligase RMA1H1-like
									Ca07059	2341426	2346753	Yes	Callose synthase-like protein
									Ca07066	2350277	2353096		uncharacterized protein LOC101494928 n=1 Tax=Cicer arietinum
									Ca07070	2354112	2360111		probable ubiquitin-conjugating enzyme E2 24
LR	CBA Captain/CICA1841	NA	TR9571	Ca1	8776117|F|0-9:C>A	2545315	2525315	2565315	Ca07088	2548691	2550710		squamosa promoter-binding-like protein 3
									Ca07092	2553736	2558834		glyoxysomal processing protease, glyoxysomal
									Ca07092	2553736	2558834		glyoxysomal processing protease
LR	PBADrummond/CICA1841	NA	TR9571	Ca1	11063160|F|0-17:G>A	3496068	3476068	3516068	Ca07210	3475023	3477277		Uncharacterized protein n=12 Tax=Papilionoideae RepID=C6SV59_SOYBN
									Ca07206	3479881	3483647		uncharacterized protein LOC101488457 n=1 Tax=Cicer arietinum
									Ca07211	3484053	3487385		RING/FYVE/PHD-type zinc finger protein
									Ca07220	3490409	3491266		probable C-terminal domain small phosphatase
									Ca07214	3503367	3504296		Putative uncharacterized protein n=3 Tax=Magnoliophyta
HTR	GWAS SET	29	TR9571	Ca1	29967414|F|0-9:T>G, 10265744|F|0-22:C>A, 10270116|F|0-65:T>C	7007144-7167009	6987144	7187009	Ca07656	6976999	7014525	Yes	Uncharacterized protein n=4 Tax=Soja RepID=I1LCX3_SOYBN
									Ca07654	7022482	7033437		protein ROOT HAIR DEFECTIVE 3 homolog 2
									Ca07658	7034053	7039820		haloacid dehalogenase-like hydrolase domain-containing protein At3g48420
									Ca07657	7042620	7043183		uncharacterized protein LOC101505049 n=1 Tax=Cicer arietinum RepID=UPI00032A5A01
									Ca07652	7066344	7068476		patatin-like protein 7
									Ca07653	7070941	7074938		accelerated cell death 11
									Ca07655	7078033	7086500		30-kDa cleavage and polyadenylation specificity factor 30
									Ca07672	7095850	7097460		peroxidase E5-like
									Ca07675	7148516	7150063		uncharacterized protein LOC101501357, partial n=1 Tax=Cicer arietinum RepID=UPI00032AC33B
									Ca07669	7160136	7163565	Yes	U3 smallucleolar RNA-interacting protein 2-like
									Ca07674	7164812	7180898	Yes	serine/threonine-protein phosphatase 6 regulatory subunit 3 isoform X1
HTR	GWAS SET	30	TR9571	Ca1	10267561|F|0-20:A>G, 10263699|F|0-7:T>C	7168618-7169815	7148618	7189815	Ca07675	7148516	7150063		uncharacterized protein LOC101501357, partial n=1 Tax=Cicer arietinum RepID=UPI00032AC33B
									Ca07669	7160136	7163565		U3 smallucleolar RNA-interacting protein 2-like
									Ca07674	7164812	7180898	Yes	serine/threonine-protein phosphatase 6 regulatory subunit 3 isoform X1
HTR	GWAS SET	31	TR9571	Ca1	10270051|F|0-40:T>C, 10265685|F|0-59:G>A	7275740-7285403	7255740	7305403	Ca07666	7264995	7271410		CCAAT-binding transcription factor
									Ca07662	7274316	7277995		Ferredoxin--NADP reductase, root isozyme, chloroplastic
									Ca07659	7280566	7281012		uncharacterized protein LOC101496792 n=1 Tax=Cicer arietinum RepID=UPI00032AAA8B
									Ca07687	7283110	7290006		ADP-ribosylation factor GTPase-activating protein AGD10
									Ca07678	7292096	7297278		2-succinylbenzoate--CoA ligase, chloroplastic/peroxisomal isoform X1
MLMM	GWAS SET	NA	TR9571	Ca1	10265685|F|0-59:G>A	7285403	7265403	7305403	Ca07666	7264995	7271410		CCAAT-binding transcription factor
									Ca07662	7274316	7277995		Ferredoxin--NADP reductase, root isozyme, chloroplastic
									Ca07659	7280566	7281012		uncharacterized protein LOC101496792 n=1 Tax=Cicer arietinum RepID=UPI00032AAA8B
									Ca07687	7283110	7290006	Yes	ADP-ribosylation factor GTPase-activating protein AGD10
									Ca07678	7292096	7297278		2-succinylbenzoate--CoA ligase, chloroplastic/peroxisomal isoform X1
HTR	GWAS SET	32	TR9571	Ca1	10263656|F|0-64:C>T, 10265001|F|0-19:A>G, 10268478|F|0-37:C>T, 5824850|F|0-16:G>A	7306441-7456870	7286441	7476870	Ca07687	7283110	7290006		ADP-ribosylation factor GTPase-activating protein AGD10
									Ca07678	7292096	7297278		2-succinylbenzoate--CoA ligase, chloroplastic/peroxisomal isoform X1
									Ca07680	7305786	7311018	Yes	WPP domain-associated protein isoform X2
									Ca07676	7314101	7316593		probable receptor-like protein kinase At1g30570
									Ca07679	7327523	7331419		LRR receptor-like kinase family protein
									Ca07677	7335456	7337826		protein KRI1 homolog
									Ca07686	7337915	7341730		probable 3-hydroxyisobutyrate dehydrogenase, mitochondrial isoform X1
									Ca07684	7343771	7345597		GAMYB-binding protein
									Ca07685	7352806	7363925	Yes	endoribonuclease Dicer homolog 2 isoform X1
									Ca07681	7376098	7379572		protein POLLENLESS 3
									Ca07682	7381712	7386486	Yes	Histidinol dehydrogenase, chloroplastic
									Ca07697	7387656	7389148		accelerated cell death 11-like
									Ca07701	7389922	7392779		pentatricopeptide repeat-containing protein At1g51965, mitochondrial
									Ca07706	7394165	7401146		uncharacterized protein LOC101503236 n=1 Tax=Cicer arietinum RepID=UPI00032A9026
									Ca07699	7412648	7419177		homeobox-leucine zipper protein HDG11-like
									Ca07698	7424786	7450929		homeobox-leucine zipper protein HDG11-like
									Ca07703	7429183	7429830		pentatricopeptide repeat-containing protein At2g44880-like, partial
									Ca07700	7450991	7456576		homeobox-leucine zipper protein HDG11-like
									Ca07702	7456912	7458118		uncharacterized protein LOC101503553 n=1 Tax=Cicer arietinum RepID=UPI00032A59A4
									Ca07707	7462276	7463040		uncharacterized protein LOC101512532 n=1 Tax=Cicer arietinum RepID=UPI00032AACA6
									Ca07704	7473423	7474505		putative germin-like protein 2-1
									Ca07705	7476621	7479290		Tubulin beta-1 chain
LR	PBADrummond/CICA1841	NA	TR9571	Ca2	5825281|F|0-54:C>T	17214916	17194916	17234916	Ca29964	17213175	17216492	Yes	uncharacterized protein LOC101512907 n=1 Tax=Cicer arietinum
									Ca29963	17221980	17226134		Probable inactive receptor-like protein kinase	7064
LR	PBADrummond/CICA1841	NA	TR9571	Ca2	5825337|F|0-63:G>A	17224325	17204325	17244325	Ca29964	17213175	17216492		uncharacterized protein LOC101512907 n=1 Tax=Cicer arietinum
									Ca29963	17221980	17226134	Yes	Probable inactive receptor-like protein kinase
									Ca29967	17236575	17238332		uncharacterized protein At5g39865-like n=1 Tax=Cicer arietinum
LR	PBADrummond/CICA1841	NA	TR9571	Ca2	5826172|F|0-44:G>T	17252672	17232672	17272672	Ca29967	17236575	17238332		uncharacterized protein At5g39865-like n=1 Tax=Cicer arietinum
									Ca29960	17257045	17259018		Ankyrin repeat	4373
									Ca29962	17263771	17268141		probable methyltransferase
LR	PBADrummond/CICA1841	NA	TR9571	Ca2	5825410|F|0-11:A>G	17283466	17263466	17303466	Ca29962	17263771	17268141		probable methyltransferase
									Ca29961	17279076	17281562		40S ribosomal protein
									Ca29966	17283371	17286153	Yes	ferritin-4, chloroplastic
									Ca29972	17292615	17296253		putative glutamine amidotransferase
LR	PBADrummond/CICA1841	NA	TR9571	Ca2	5825666|F|0-35:G>T	17527340	17507340	17547340	Ca29992	17507198	17511719		Alpha-solubleSF attachment protein
									Ca29985	17512762	17516326		putative sodium-coupledeutral amino acid transporter 10
									Ca29987	17526500	17535290	Yes	probable sodium-coupledeutral amino acid transporter 6
									Ca29991	17536414	17540857		uncharacterized protein At2g40430-like isoform X1 n=2 Tax=Cicer arietinum
									Ca29988	17545511	17548408		uncharacterized protein LOC101501338 n=1 Tax=Cicer arietinum
									Ca29982	17558826	17560469		Transcription factor bHLH93-like protein
LR	PBADrummond/CICA1841	NA	TR9571	Ca2	5826151|F|0-33:T>A	17559304	17539304	17579304	Ca29991	17536414	17540857		uncharacterized protein At2g40430-like isoform X1 n=2 Tax=Cicer arietinum
									Ca29988	17545511	17548408		uncharacterized protein LOC101501338 n=1 Tax=Cicer arietinum
									Ca29990	17564921	17565923		uncharacterized protein LOC101494235 n=1 Tax=Cicer arietinum
									Ca29981	17566819	17569700		uncharacterized protein LOC101514773 n=1 Tax=Cicer arietinum
									Ca29986	17574378	17576047		Peroxidase P7
									Ca29997	17579241	17596608		probable leucine-rich repeat receptor-like serine/threonine-protein kinase
LR	PBADrummond/CICA1841	NA	TR9571	Ca2	5825181|F|0-21:T>C	17978554	17958554	17998554	Ca30011	17976236	17980227	Yes	Uncharacterized protein n=10 Tax=Papilionoideae RepID=I1JVB1_SOYBN
									Ca30016	17986324	17991195		Protein-tyrosine-phosphatase IBR5
LR	PBADrummond/CICA1841	NA	TR9571	Ca2	5825673|F|0-30:A>G	17992915	17972915	18012915	Ca30011	17976236	17980227		Uncharacterized protein n=10 Tax=Papilionoideae RepID=I1JVB1_SOYBN
									Ca30016	17986324	17991195		Protein-tyrosine-phosphatase IBR5
LR	PBADrummond/CICA1841	NA	TR9571	Ca2	5825515|F|0-12:A>G	18060842	18040842	18080842	Ca30019	18040684	18045135		Uncharacterized protein n=11 Tax=Papilionoideae RepID=I1JIH4_SOYBN
									Ca30022	18047795	18051765		triacylglycerol lipase 2-like isoform X1
									Ca30023	18054246	18058689		uncharacterized protein LOC105851663 n=1 Tax=Cicer arietinum
									Ca30020	18060182	18072465	Yes	E3 ubiquitin-protein ligase BRE1-like 2 isoform X1
LR	PBADrummond/CICA1841	NA	TR9571	Ca2	5825314|F|0-38:G>T	18485579	18465579	18505579	Ca30056	18465581	18469111		LRR receptor-like serine/threonine-protein kinase
									Ca30065	18503627	18504080		uncharacterized protein LOC101493909 n=1 Tax=Cicer arietinum
HTR	GWAS SET	89	F17191-1	Ca4	8776080|F|0-44:G>A, 8776155|F|0-45:G>T	14931208-15003392	14911208	14951208	Ca12095	14910667	14919098		ATP synthase subunit beta
									Ca12096	14921422	14925004		MATE efflux family protein 5-like isoform X1
									Ca12092	14928905	14938346	Yes	MATE efflux family protein 5-like
									Ca12087	14940620	14943578		uncharacterized protein LOC101501684 n=1 Tax=Cicer arietinum RepID=UPI00032A6B72
									Ca12093	14944580	14948233		sec-independent protein translocase protein TATC
									Ca12089	14949290	14954481		Origin recognition complex subunit 4
									Ca12100	14987936	15002018		ATP-dependent RNA helicase DHX36 isoform X1
									Ca12101	15002201	15006261	Yes	Fructose-bisphosphate aldolase
									Ca12099	15015946	15020598		uncharacterized PKHD-type hydroxylase At1g22950-like
HTR	GWAS SET	90	TR9571	Ca4	11063780|F|0-12:A>T, 15979307|F|0-15:A>C, 5824854|F|0-38:G>C	15413014-15448710	15393014	15433014	Ca12128*	15390554	15393309		probable serine/threonine-protein kinase At1g18390
									Ca12127*	15413919	15417936		Uncharacterized protein n=8 Tax=Papilionoideae RepID=I1NFM6_SOYBN
									Ca12125*	15418786	15432708		probable receptor-like protein kinase At1g67000 isoform X1
									Ca12129*	15432940	15435601		probable leucine-rich repeat receptor-like protein kinase At1g68400
									Ca12123*	15453847	15459566		Chaperone DnaJ domain protein
HTR	GWAS SET	91	TR9571	Ca4	13146286|F|0-51:A>C, 15990257|F|0-51:A>T	15484345-15562356	15464345	15504345	Ca12131	15483996	15488401	Yes	cysteine--tRNA ligase, cytoplasmic
									Ca12133	15504180	15505174		uncharacterized protein LOC101492865 n=1 Tax=Cicer arietinum RepID=UPI00032A6243
MLMM	GWAS SET	NA	TR9571	Ca4	10266440|F|0-5:C>T	15657995	15637995	15677995	Ca12146	15650537	15653361		caffeoylshikimate esterase-like
									Ca12147	15654405	15658065	Yes	Regulator of Vps4 activity in the MVB pathway protein
									Ca12150	15664244	15665577		uncharacterized protein LOC106770274 n=1 Tax=Vigna radiata var. radiata RepID=UPI0007114F78
									Ca12149	15666386	15669645		uncharacterized protein LOC101503488 n=1 Tax=Cicer arietinum RepID=UPI00032A9607
HTR	GWAS SET	92	TR9571	Ca4	11063996|F|0-5:T>A, 10269593|F|0-7:T>A, 10265886|F|0-48:T>G, 10267389|F|0-17:T>A, 11063189|F|0-9:A>G	15977950-16026733	15957950	16046733	Ca12158	15957186	15960060		ACD11 homolog protein
									Ca12160	15962868	15967945		dihydrolipoyllysine-residue acetyltransferase component 4 of pyruvate dehydrogenase complex
									Ca12157	15969013	15969850		uncharacterized protein LOC101502645 isoform X1 n=2 Tax=Cicer arietinum RepID=UPI00032A4F5C
									Ca12161	15973580	15984001	Yes	serine/threonine-protein kinase prpf4B
									Ca12167	15996178	15997962	Yes	uncharacterized protein LOC101503192 n=1 Tax=Cicer arietinum RepID=UPI00032A54D9
									Ca12164	16025059	16025607		uncharacterized protein LOC101505214 n=1 Tax=Cicer arietinum RepID=UPI00032A6FA5
HTR	GWAS SET	93	F17191-1	Ca4	8776145|F|0-11:C>T, 8776039|F|0-48:C>A, 8776037|F|0-68:A>T, 10268380|F|0-58:C>T, 10266484|F|0-36:C>G, 10265186|F|0-65:C>T, 5826163|F|0-14:C>T, 5825449|F|0-22:C>T	16478514-16635135	16458514	16655135	Ca12203	16464434	16479712	Yes	protein transport protein Sec24-like At4g32640
									Ca12207	16481323	16483258		uncharacterized protein LOC101495543 n=1 Tax=Cicer arietinum RepID=UPI00032A813B
									Ca12205	16483506	16486696		Pyruvate carrier-like protein
									Ca12216	16488291	16490596	Yes	uncharacterized protein LOC101495873 n=1 Tax=Cicer arietinum RepID=UPI00032A5FFB
									Ca12222	16492543	16496811		putative Myb family transcription factor At1g14600
									Ca12223	16519876	16523616	Yes	Glycerate dehydrogenase
									Ca12218	16528258	16529860		serine/threonine-protein phosphatase
									Ca12220	16531630	16536272		Pre-mRNA-splicing factor syf2
									Ca12221	16541132	16544254		uncharacterized protein LOC101497735 isoform X1 n=2 Tax=Cicer arietinum RepID=UPI00032A601B
									Ca12215	16556391	16559764		transcription factor ABORTED MICROSPORES
									Ca12217	16563596	16564565		LOW QUALITY PROTEIN: GDSL esterase/lipase At1g23500-like
									Ca12224	16568756	16574586	Yes	Acetyl-CoA carboxylase
									Ca12219	16584138	16585038		mavicyanin-like
									Ca12232	16588498	16595235		probable ubiquitin-conjugating enzyme E2
									Ca12235	16597591	16627235		FAD/NAD(P)-binding oxidoreductase family protein
									Ca12228	16600123	16602607		serine/threonine-protein phosphatase 7 long form homolog
									Ca12234	16628413	16638349	Yes	RNA-binding protein 39
									Ca12231	16640845	16645857		uncharacterized protein LOC101501802 isoform X1 n=2 Tax=Cicer arietinum RepID=UPI00032A57B9
SLMM/MLMM	GWAS SET	NA	F17191-1	Ca4	8776003|F|0-61:T>C	36231638	36211638	36251638	Ca13513	36217006	36219504		F-box protein SKP2B
									Ca13517	36220150	36224126		chaperone protein
									Ca13516	36225721	36232356	Yes	DNA repair protein
MLMM	GWAS SET	NA	TR9571	Ca4	8776114|F|0-21:C>T	36327109	36307109	36347109	Ca13526	36316137	36318911		bidirectional sugar transporter SWEET1
									Ca13522	36326928	36333894	Yes	Exostosin family protein
									Ca13523	36342206	36352358		F-box/LRR-repeat protein At3g48880-like
HTR	GWAS SET	110	F17191-1	Ca4	11064111|F|0-36:A>G, 15979457|F|0-60:C>T	37829979-37830058	37809979	37850058	Ca13634	37813668	37816636		uncharacterized protein At4g00950-like n=1 Tax=Cicer arietinum RepID=UPI00032ABA95
									Ca13637	37819308	37820225		uncharacterized protein LOC101500142 n=2 Tax=Cicer arietinum RepID=UPI00032A6B76
									Ca13632	37820238	37821001		uncharacterized protein LOC101500142 n=2 Tax=Cicer arietinum RepID=UPI00032A6B76
									Ca13633	37826049	37831276		protein IQ-DOMAIN 1-like
									Ca13630	37845884	37873849	Yes	uncharacterized protein LOC101490815 isoform X1 n=2 Tax=Cicer arietinum RepID=UPI0006414D65
HTR	GWAS SET	111	F17191-1	Ca4	5826025|F|0-36:C>T, 5825419|F|0-36:A>G	37856016-37991817	37822015	38011817	Ca13630	37845884	37873849		uncharacterized protein LOC101490815 isoform X1 n=2 Tax=Cicer arietinum RepID=UPI0006414D65
									Ca13631	37882663	37885598		uncharacterized protein LOC101491713 n=1 Tax=Cicer arietinum RepID=UPI00032A9984
									Ca13639	37894169	37903342		uncharacterized protein LOC101491141 n=1 Tax=Cicer arietinum RepID=UPI00032A731D
									Ca13641	37905166	37911595		E3 ubiquitin-protein ligase
									Ca13643	37909526	37910347		E3 ubiquitin-protein ligase
									Ca13642	37912802	37917169		probable pectinesterase/pectinesterase inhibitor 61
									Ca13644	37939450	37948071		Plant invertase/pectin methylesterase inhibitor protein
									Ca13638	37953992	37962558		O-acyltransferase WSD1-like
									Ca13640	37965365	37968100		protein BOBBER 1
									Ca13649	37976328	37992363	Yes	histone-lysine-methyltransferase ATX5-like
									Ca13651	37992984	37999144		Uncharacterized protein n=11 Tax=Papilionoideae RepID=I1K992_SOYBN
									Ca13647	38003088	38006092		uncharacterized protein LOC101499684 n=1 Tax=Cicer arietinum RepID=UPI000640E296
									Ca13653	38010647	38013840		pentatricopeptide repeat-containing protein At5g25630-like
HTR	GWAS SET	112	F17191-1	Ca4	5825835|F|0-6:T>G, 5826257|F|0-23:T>C, 5825174|F|0-55:G>C, 5825899|F|0-27:A>G, 11063609|F|0-24:C>T	38027338-38123012	38007338	38143012	Ca13653	38010647	38013840		pentatricopeptide repeat-containing protein At5g25630-like
									Ca13646	38016489	38019271		Peroxisomal membrane 22 kDa (Mpv17/PMP22) family protein
									Ca13652	38021442	38024062		pentatricopeptide repeat-containing protein At2g30780-like
									Ca13648	38024727	38029569	Yes	diphthamide biosynthesis protein 2
									Ca13650	38037964	38042065		indole-3-pyruvate monooxygenase YUCCA6-like
									Ca13645	38062583	38065803		dehydration-responsive protein RD22
									Ca13660	38070451	38091210	Yes	helicase and polymerase-containing protein TEBICHI
									Ca13659	38109318	38110817		uncharacterized protein LOC101503071 isoform X1 n=2 Tax=Cicer arietinum RepID=UPI0006413767
									Ca13657	38120753	38123406	Yes	2-on-2 hemoglobin
									Ca13655	38142066	38144961		NAC domain-containing protein 100
HTR	GWAS SET	120	F17191-1	Ca4	10270073|F|0-48:G>A, 15990248|F|0-13:C>A	56597931-56643812	56577931	56663812	Ca14794	56576913	56580033		succinate dehydrogenase subunit 5, mitochondrial
									Ca14796	56584507	56586866		patatin-like protein 2
									Ca14804	56593270	56605792	Yes	uncharacterized protein LOC101512730 isoform X1 n=3 Tax=Cicer arietinum RepID=UPI00032A90B2
									Ca14807	56609086	56611935		probable inactive heme oxygenase 2, chloroplastic
									Ca14803	56613659	56616082		uncharacterized protein LOC101490817, partial n=1 Tax=Cicer arietinum RepID=UPI0006417544
									Ca14810	56618564	56627324		Uncharacterized protein n=7 Tax=Papilionoideae RepID=I1M8J6_SOYBN
									Ca14805	56641288	56645588	Yes	polyadenylate-binding protein RBP47C-like
									Ca14811	56647140	56651864		serine carboxypeptidase II-3-like isoform X2
HTR	GWAS SET	135	F17191-1	Ca6	11063808|F|0-67:A>G, 10264973|F|0-46:A>G, 10266465|F|0-45:A>G	8125348-8262406	8105348	8282406	Ca02717	8102046	8106311		neurofibromin-A-like
									Ca02718	8121996	8129915	Yes	AP-5 complex subunit zeta-like protein
									Ca02716	8132949	8139999		long-chain-alcohol oxidase FAO1-like isoform X1
									Ca02712	8154239	8156083		F-box/FBD/LRR-repeat protein At5g53840-like
									Ca02713	8167489	8170135		F-box/LRR-repeat protein At3g26922-like
									Ca02714	8176249	8177200		putative F-box/FBD/LRR-repeat protein At3g49030
									Ca02715	8177360	8183427		F-box/RNI/FBD-like domain protein
									Ca02710	8185924	8187310		uncharacterized protein LOC101495900 n=1 Tax=Cicer arietinum RepID=UPI00032A77D6
									Ca02701	8189261	8191211		Uncharacterized protein n=9 Tax=Brassicaceae RepID=M4DDJ0_BRARP
									Ca02697	8193943	8195454		senescence-specific cysteine protease SAG39-like
									Ca02706	8195807	8198106		uncharacterized protein LOC101496882 isoform X1 n=1 Tax=Cicer arietinum RepID=UPI00032AB737
									Ca02698	8206697	8208139		senescence-specific cysteine protease SAG39-like
									Ca02702	8210156	8213657		uncharacterized protein LOC101497771 isoform X1 n=2 Tax=Cicer arietinum RepID=UPI00032AB4BF
									Ca02705	8215355	8216074		LOW QUALITY PROTEIN: uncharacterized protein LOC101498305
									Ca02700	8224635	8228364	Yes	TIR-NBS-LRR disease resistance protein
									Ca02708	8245649	8248090		Ras-related protein Rab11E
									Ca02699	8255828	8261049		Trehalose-6-phosphate synthase domain protein
									Ca02709	8263264	8264714		uncharacterized protein LOC101493517 n=1 Tax=Cicer arietinum RepID=UPI000640D848
									Ca02703	8265554	8265799		serine/threonine-protein phosphatase 7 long form homolog
HTR	GWAS SET	141	F17191-1	Ca6	10266288|F|0-61:A>C, 10266152|F|0-13:C>T	11049083-11138183	11029083	11158183	Ca02983	11036680	11039120		thaumatin-like protein 1b
									Ca02986	11046591	11049539	Yes	Nodulin-like/MFS transporter
									Ca02985	11066262	11069816		Peptidyl-prolyl cis-trans isomerase
									Ca02982	11076689	11080476		choline transporter-like protein 5
									Ca03001	11095569	11096626		Uncharacterized protein n=26 Tax=rosids RepID=I3SSQ7_MEDTR
									Ca03006	11102660	11104206		Polyubiquitin
									Ca03002	11134604	11136303		uncharacterized protein LOC101495575 n=1 Tax=Cicer arietinum RepID=UPI00032ACF96
									Ca03005	11137822	11140505	Yes	Transmembrane amino acid transporter family protein
LR	PBADrummond/CICA1841	NA	TR9571	Ca7	8776178|F|0-27:G>A	2352759	2332759	2372759	Ca15245	2352411	2353529	Yes	UPF0496 plant-like protein
									Ca15244	2359710	2360834		geranylgeranyl pyrophosphate synthase, chloroplastic-like
LR	PBADrummond/CICA1841	NA	TR9571	Ca7	5825848|F|0-66:T>C	23532379	23512379	23552379	Ca16807	23521706	23525170		uncharacterized protein LOC101512926 n=1 Tax=Cicer arietinum
									Ca16808	23525174	23525598		uncharacterized protein LOC101510873 n=1 Tax=Cicer arietinum
									Ca16809	23527888	23532922	Yes	uncharacterized protein LOC101498678 isoform X1 n=2 Tax=Cicer arietinum
LR	PBADrummond/CICA1841	NA	TR9571	Ca7	5825371|F|0-9:A>T	23744896	23724896	23764896	Ca16822	23741641	23746521	Yes	Zinc finger CCCH domain-containing protein 62-like
									Ca16824	23748276	23751691		Synaptobrevin-like protein
									Ca16823	23755462	23760436		vesicle transport protein
									Ca16821	23763595	23766444		pentatricopeptide repeat-containing protein
